# Supplementary material
Source: PubMed Central journal article supplement (PMC2682425)

**Supplemental Data**

Cell Host & Microbe, *Volume 4*

Autophagosome-Independent Essential Function for the Autophagy Protein Atg5 in Cellular Immunity to Intracellular Pathogens

Zijiang Zhao, Blima Fux, Megan Goodwin, Ildiko R. Dunay, David Strong, Brian C. Miller, Ken Cadwell, Monica Delgado-Vargas, Marisa Ponpuak, Karen G. Green, Robert E. Schmidt, Noboru Mizushima, Vojo Deretic, L. David Sibley, and Herbert W. Virgin



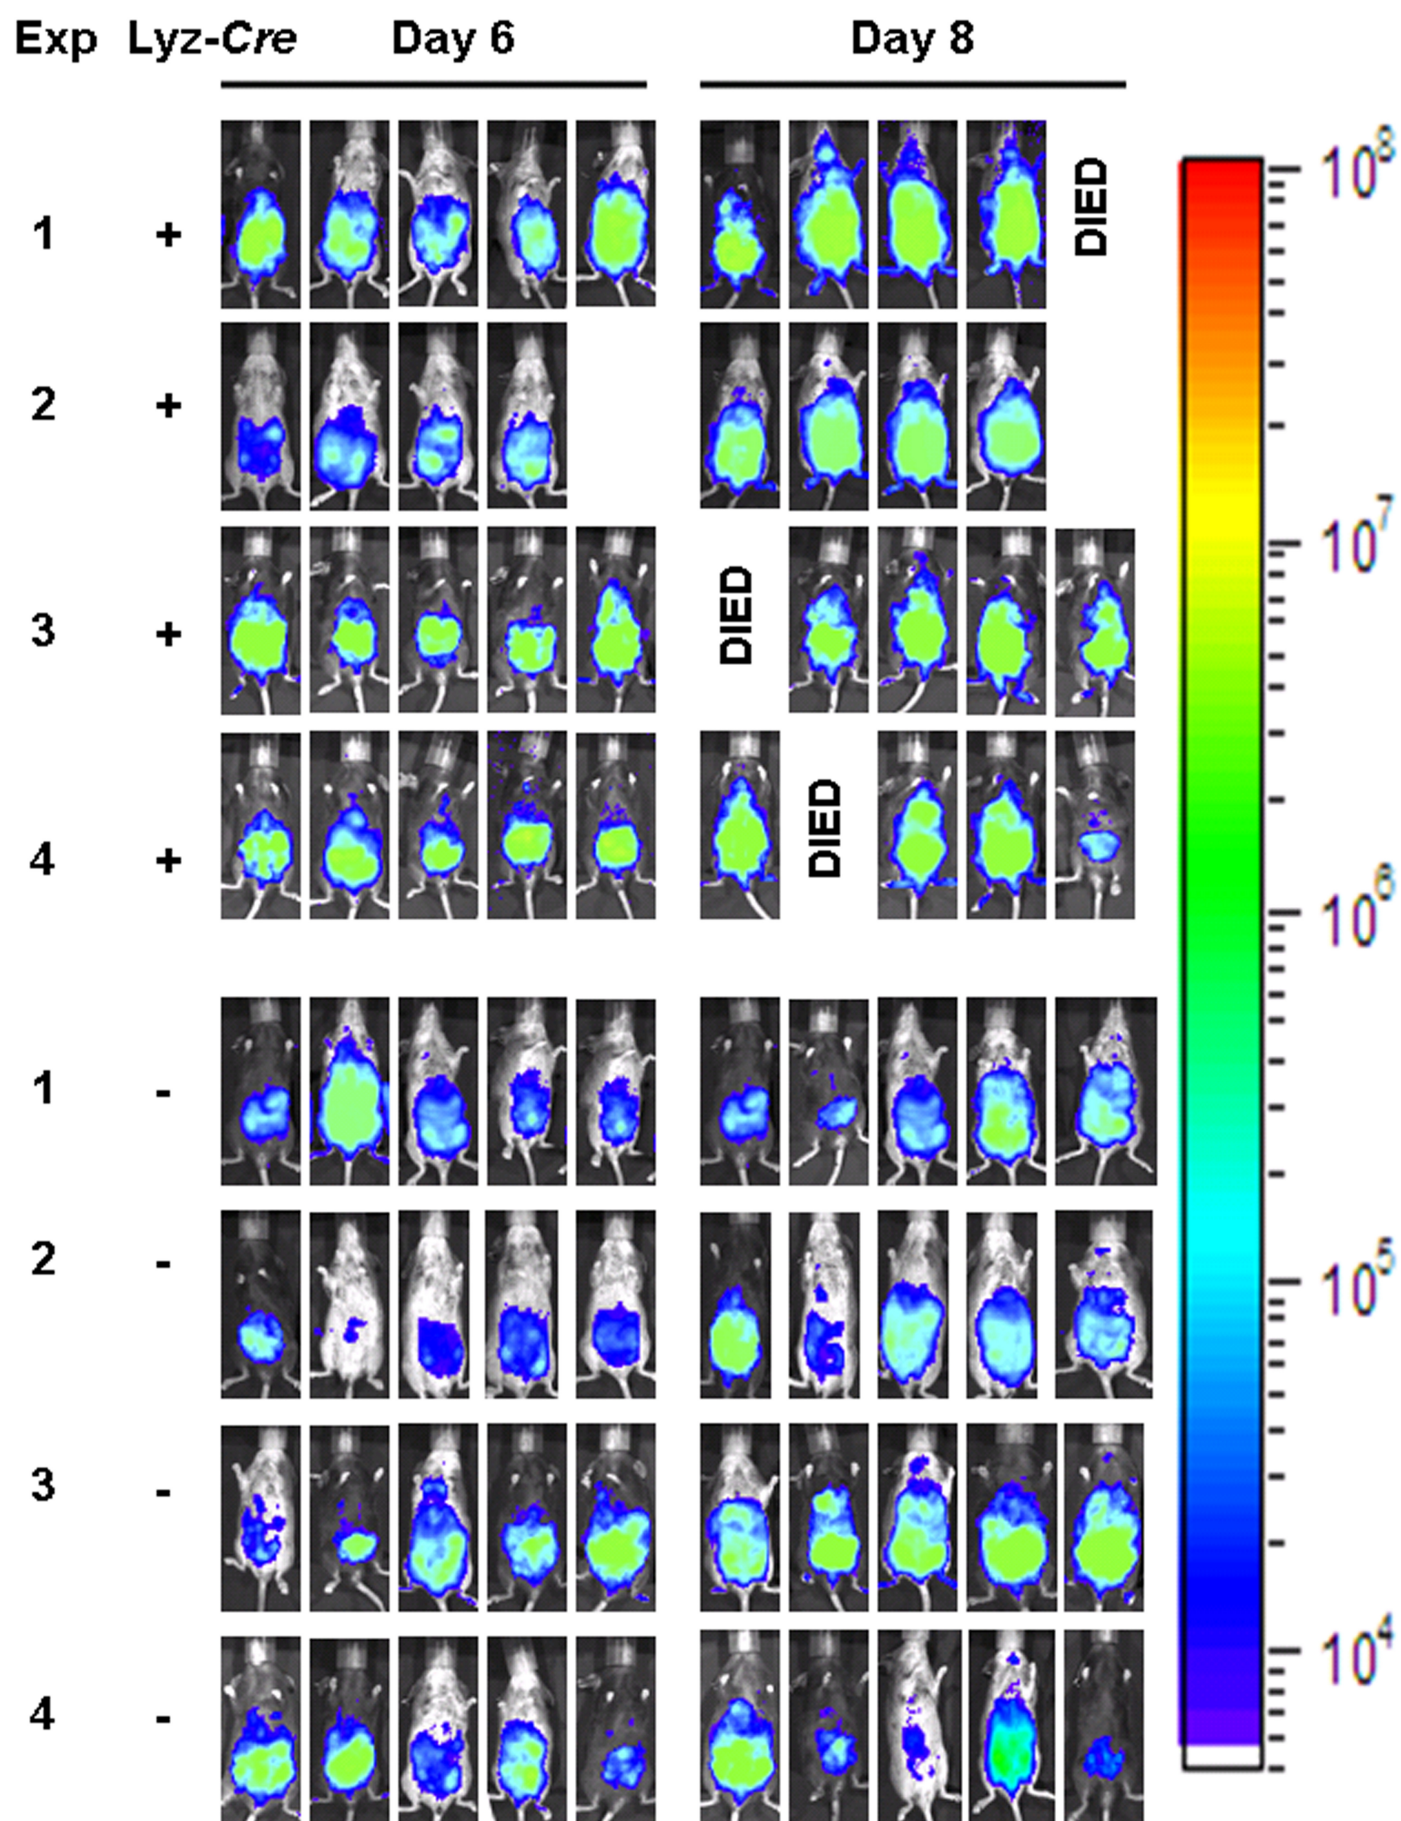

### Parasites/0.1ml (Pru-Luc, Log<sub>10</sub>)

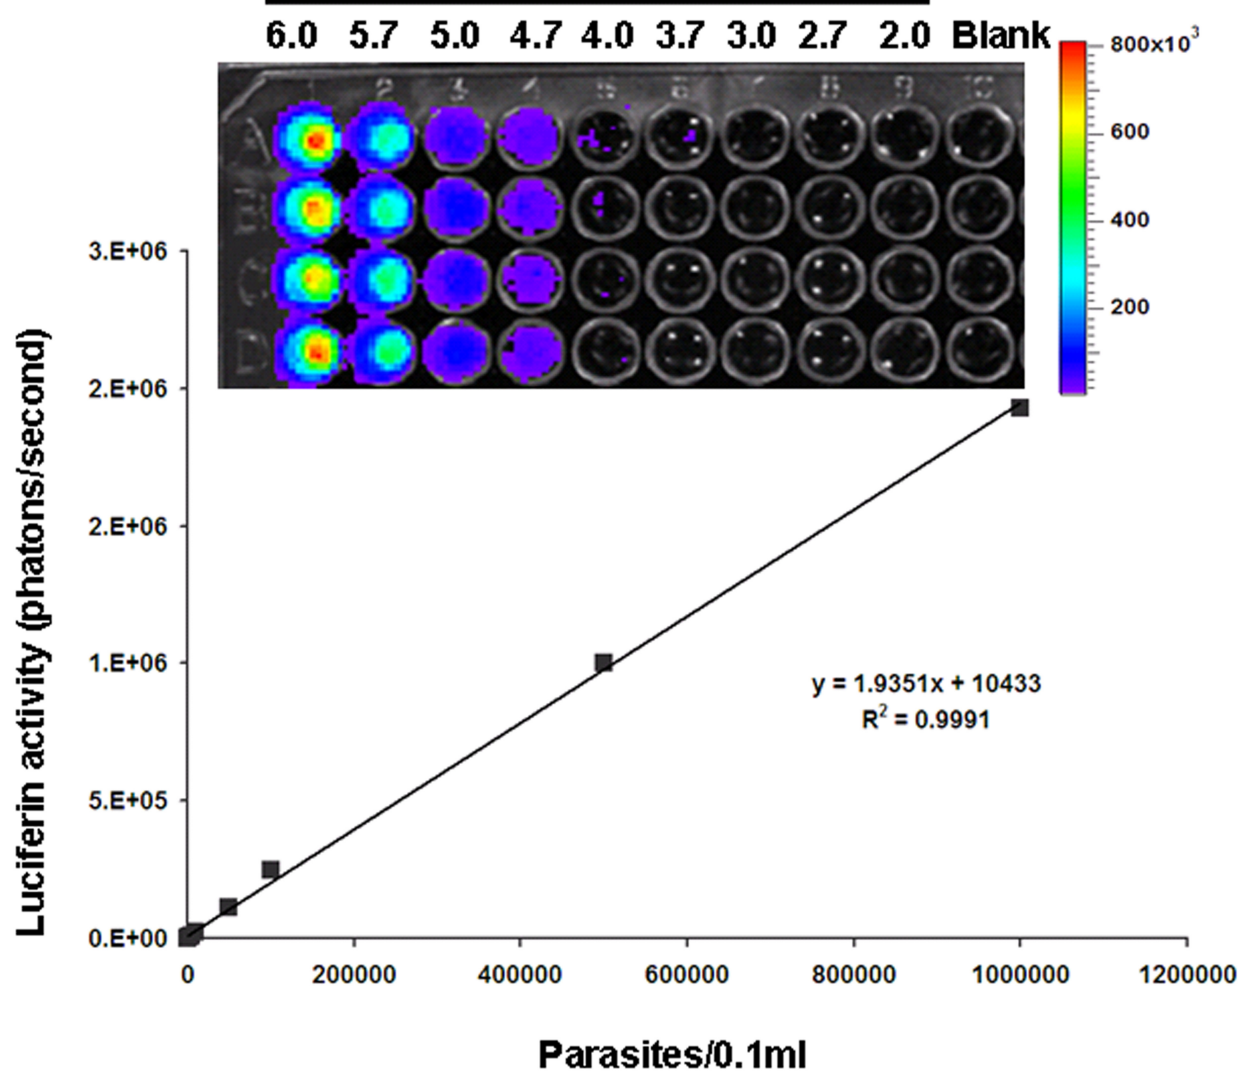

Supplement: NIHMS79827-supplement-01.pdf [file NIHMS79827-supplement-01.pdf]
